# Supplementary material for: Development of Arteannuin B Sustained-Release Microspheres for Anti-Tumor Therapy by Integrated Experimental and Molecular Modeling Approaches
Source: Pharmaceutics. 2021 Aug 11;13(8):1236. doi: 10.3390/pharmaceutics13081236 (PMC8399913; doi:10.3390/pharmaceutics13081236)
Supplement: Supplementary file 1 [file pharmaceutics-13-01236-s001.zip › pharmaceutics-1300637-supplementary.pdf]

# Supplementary Materials: Development of Arteannuin B Sustained-Release Microspheres for Anti-Tumor Therapy by Integrated Experimental and Molecular Modeling Approaches

Yanqing Wang, Weijuan Huang, Nannan Wang, Defang Ouyang, Lifeng Xiao, Sirui Zhang, Xiaozheng Ou, Tingsha He, Rongmin Yu and Liyan Song

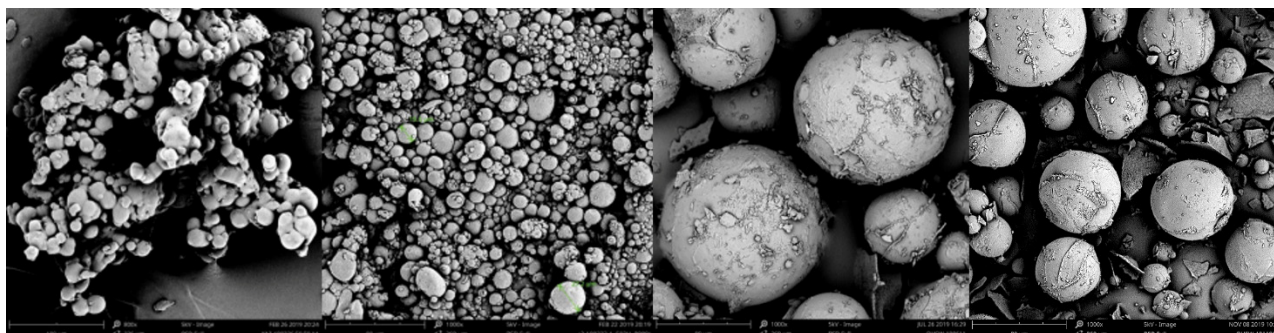

**Figure S1.** Electron micrographs of ABMs prepared with different PLGAs. SEM images: (A) 5050 1A; (B) 502H; (C) 7525 5A; (D) 5050 2.5A.
